# Supplementary material for: Ni-doped hyperbranched PdCu nanocrystals for efficient electrocatalytic borohydride oxidation
Source: Royal Society of Chemistry journal article supplement (doi:10.1039/d2ta07066a), 2022-01-01
Supplement: d2ta07066a1.pdf [file d2ta07066a1.pdf]

Supporting Information for

**Ni-doped hyperbranched PdCu nanocrystals for efficient  
electrocatalytic borohydride oxidation**

Hugang Zhang, Songliang Liu, Ziqiang Wang\*, Xinmiao Li, Kai Deng, Hongjie Yu, Xin Wang,

You Xu, Hongjing Wang\* and Liang Wang\*

State Key Laboratory Breeding Base of Green-Chemical Synthesis Technology, College of  
Chemical Engineering, Zhejiang University of Technology, Hangzhou 310014, P. R. China

\*Corresponding authors: Ziqiang Wang; Hongjing Wang, Liang Wang

E-mails: zqwang@zjut.edu.cn, hjw@zjut.edu.cn, wangliang@zjut.edu.cn.

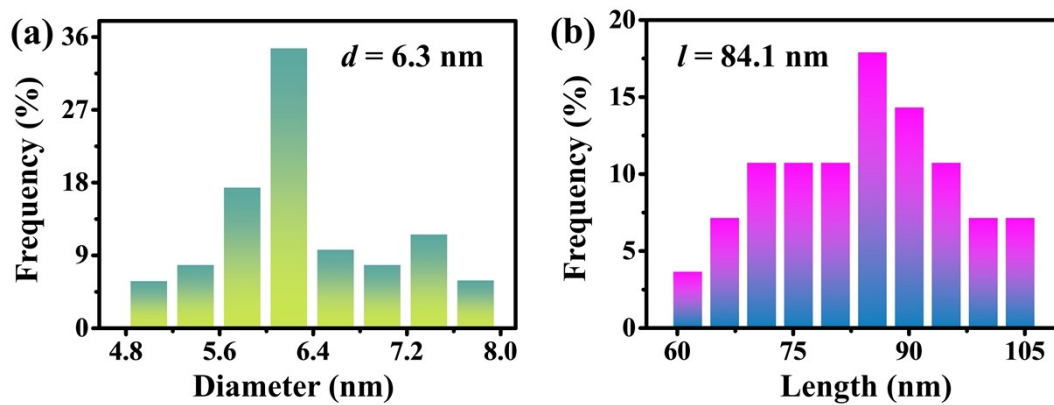

**Fig. S1.** Histograms of (a) the diameter and (b) length distribution of branches for Ni-PdCuNi NCs.

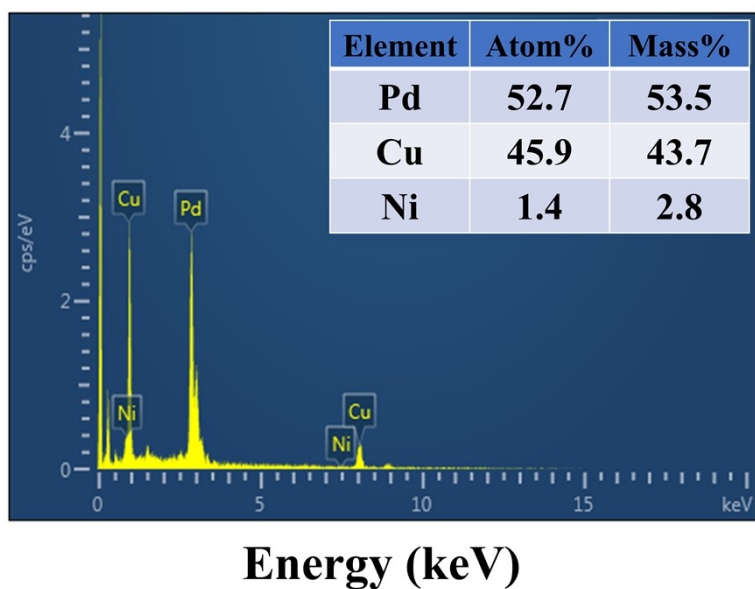

**Fig. S2.** The EDS spectrum of Ni-PdCu NCs.

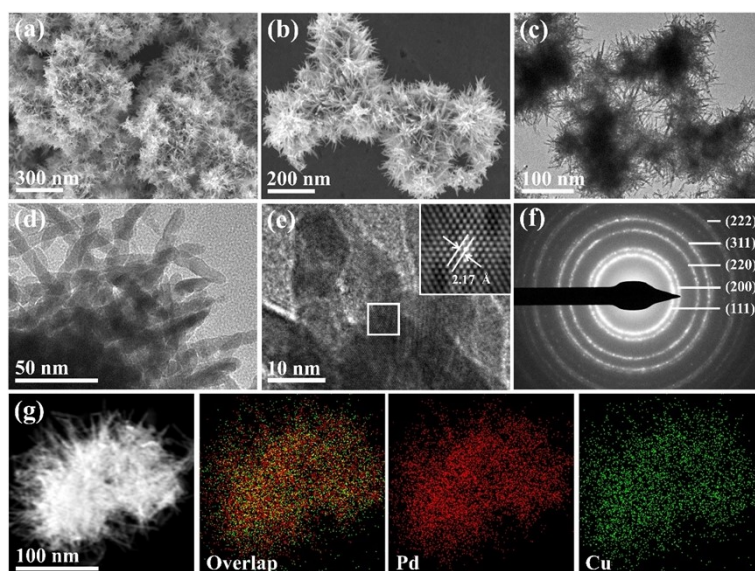

**Fig. S3.** (a, b) SEM, (c, d) TEM, and (e) HRTEM images of PdCu NCs, (f) corresponding SAED pattern. (g) HAADF-STEM image and the corresponding elemental mapping images of PdCu NCs. Inset of (e) is the corresponding the Fourier filtered lattices.

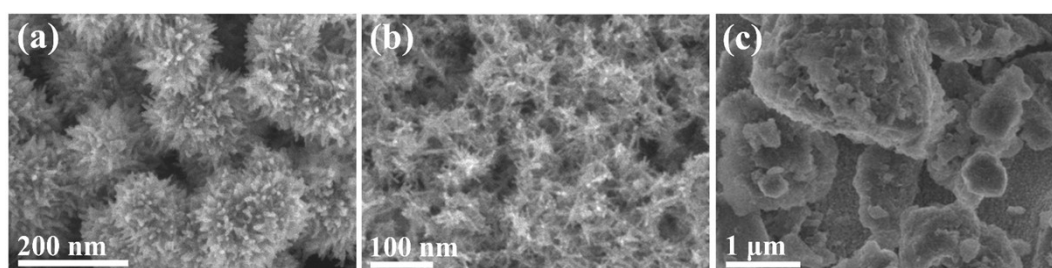

**Fig. S4.** (a) SEM images of samples obtained without surfactant, and SEM images of samples obtained with (b) F127 and (c) PVP.

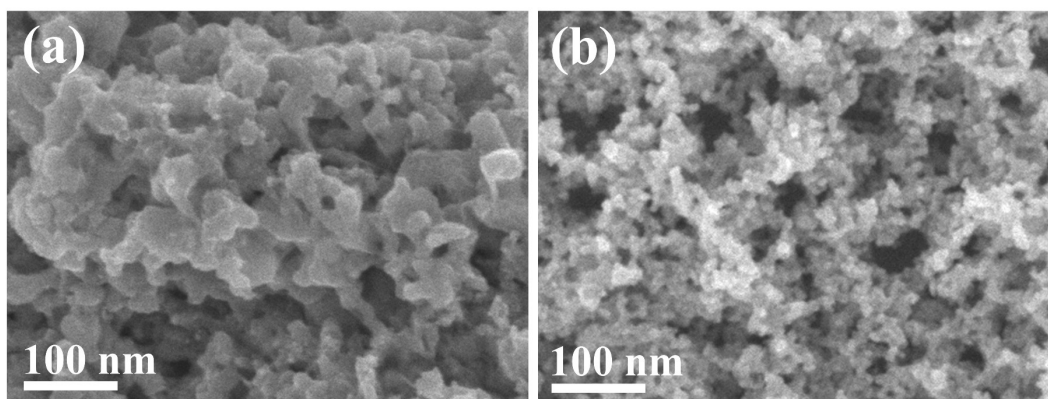

**Fig. S5.** SEM images of samples obtained with different reducing agents: (a)  $\text{NaBH}_4$  and (b) DMAB.

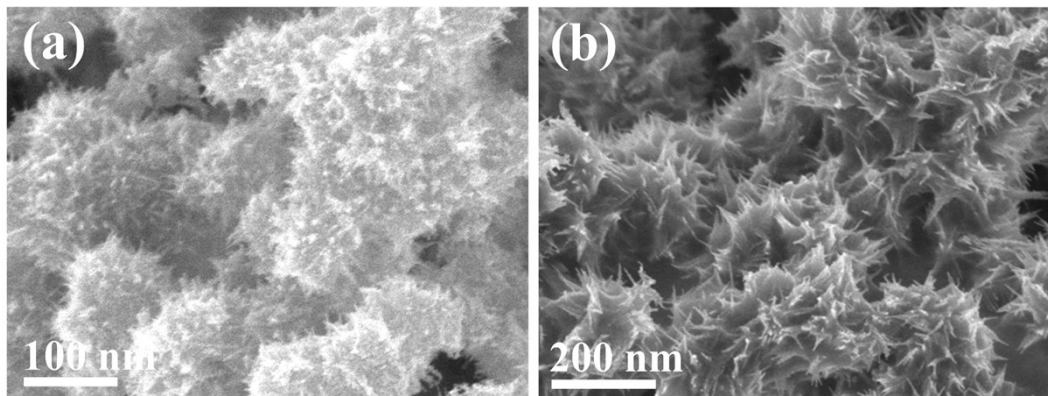

**Fig. S6.** SEM images of samples prepared with different amounts of KBr under the typical synthesis: (a) 0 mg and (b) 400 mg.

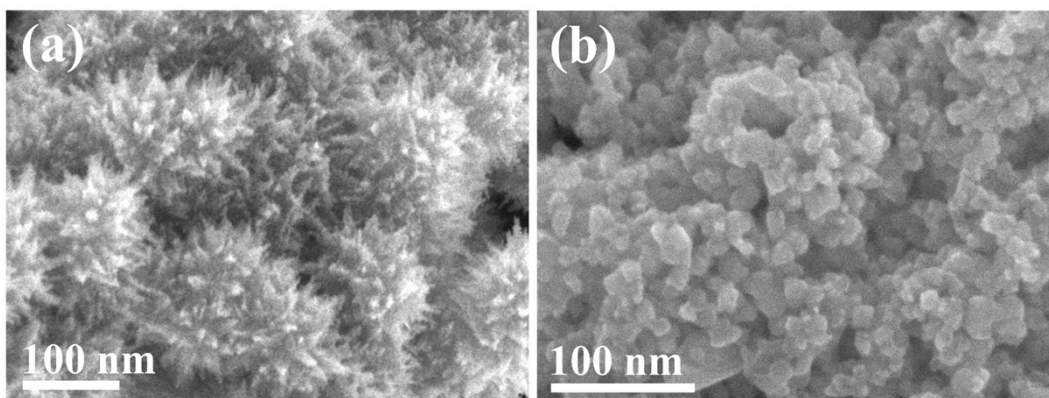

**Fig. S7.** SEM images of samples prepared by replacing KBr with (a) KCl and (b) KI under the typical synthesis.

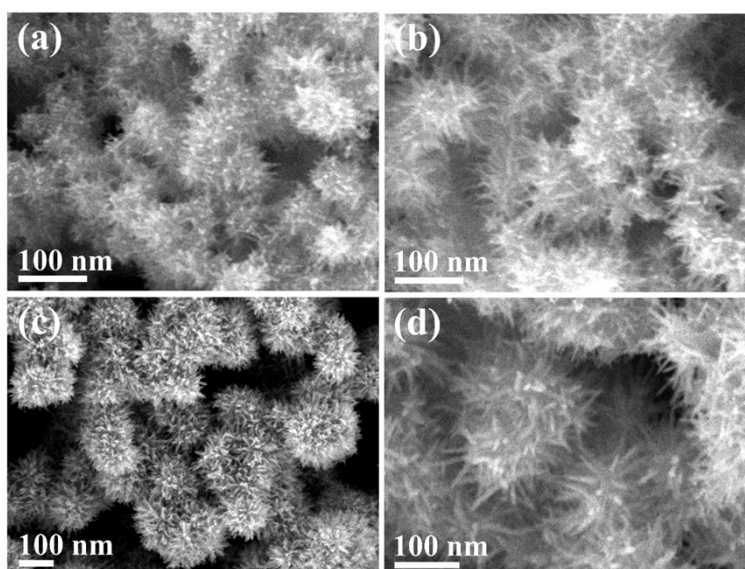

**Fig. S8.** SEM images of samples prepared with the different molar ratios of Pd/Cu/Ni precursors under the typical synthesis. The added metallic precursor amounts of  $\text{Na}_2\text{PdCl}_4$ ,  $\text{CuCl}_2$ , and  $\text{NiCl}_2$  are (a) 1.0 mL, 4.0 mL and 0.5 mL, (b) 1.5 mL, 3.5 mL and 0.5 mL, (c) 2.5 mL, 2.5 mL and 0.5 mL, and (d) 3.5 mL, 1.5 mL and 0.5 mL.

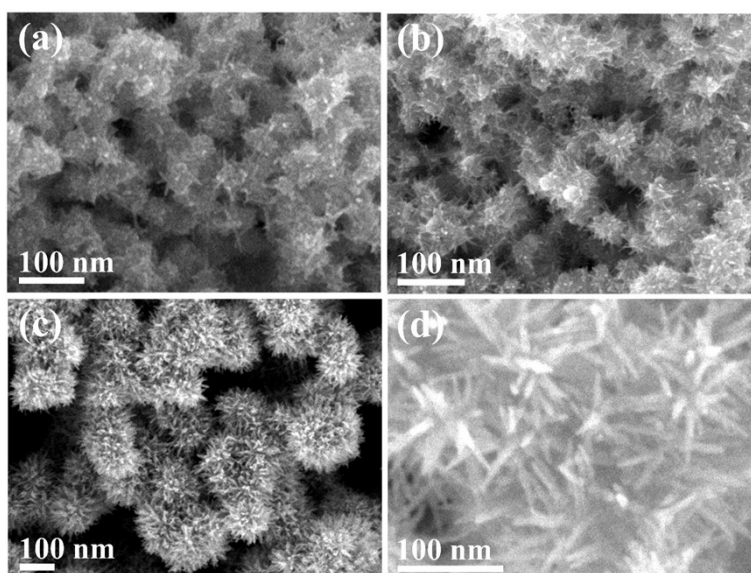

**Fig. S9.** SEM images of the samples prepared with different amounts of HCl under the typical synthesis: (a) 0 mL, (b) 0.05 mL, (c) 0.1 mL (d) 0.2 mL.

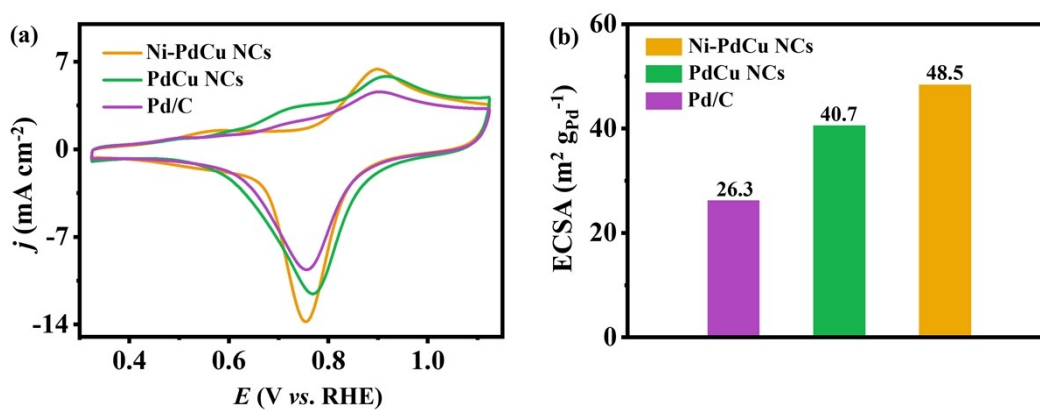

**Fig. S10.** (a) CV curves of the various catalysts in a N<sub>2</sub>-saturated 1.0 M KOH at a scan rate of 50 mV s<sup>-1</sup>. (b) ECSAs of Ni-PdCu NCs, PdCu NCs and commercial Pd/C.



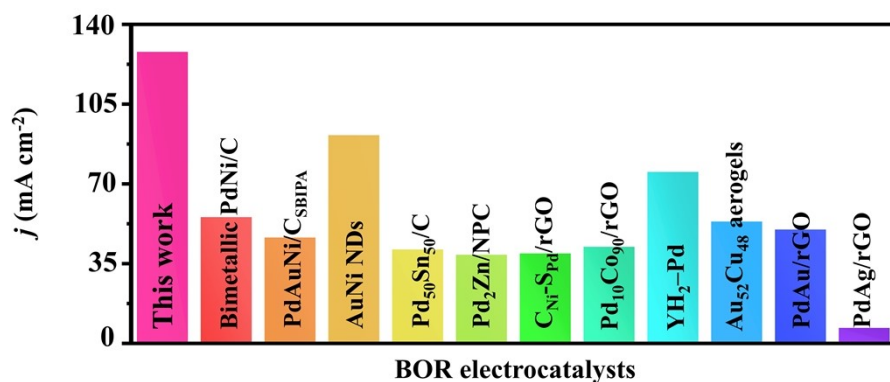

Fig. S11. BOR current densities on various reported catalysts.

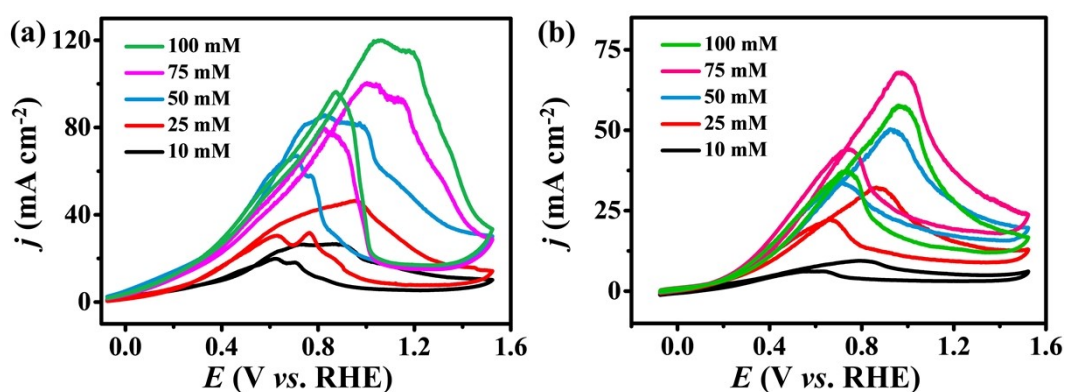

Fig. S12. CV curves of (a) PdCu NCs and (b) Pd/C in 1.0 M KOH solution with different concentrations of NaBH<sub>4</sub> at a scan rate of 50 mV s<sup>-1</sup>.

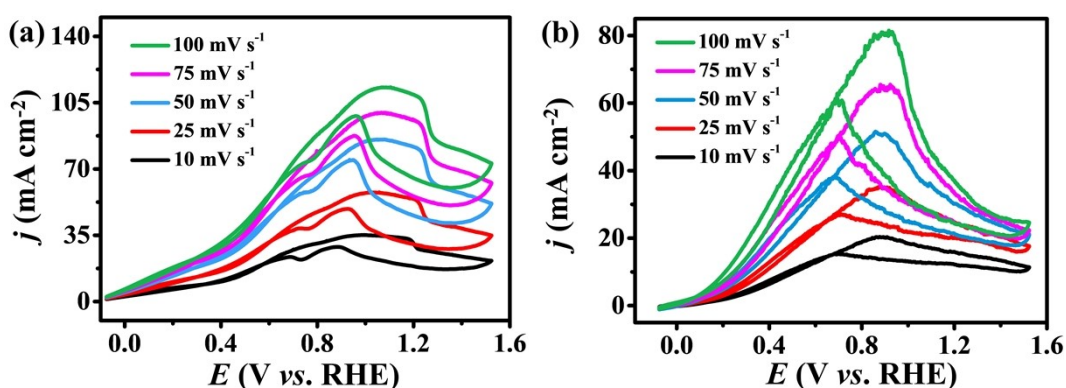

Fig. S13. CV curves of (a) PdCu NCs and (b) Pd/C in 1.0 M KOH containing 50 mM NaBH<sub>4</sub> solution with different scan rates.

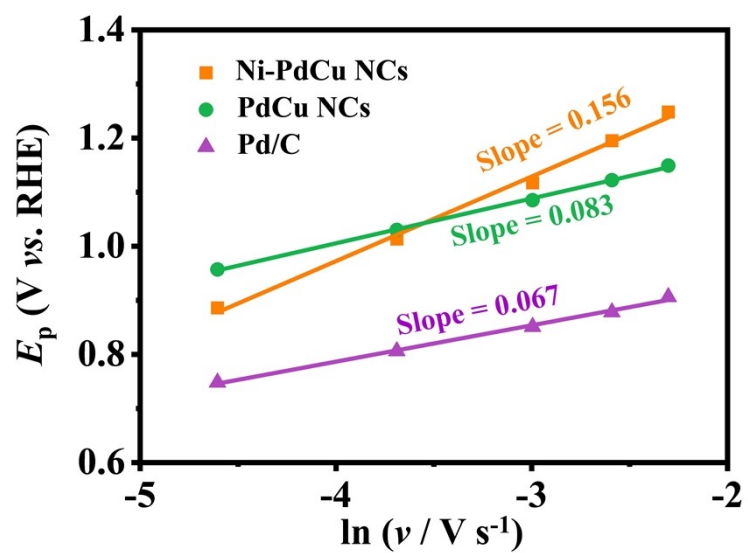

Fig. S14. The fitted  $E_p$  vs.  $\ln v$  plot for all electrocatalysts.



**Table S1.** The current density comparison of BOR on recently reported various electrocatalysts.

| Catalysts                                  | Condition                                              | Sweep rate<br>(mV s <sup>-1</sup> ) | Current density<br>(mA cm <sup>-2</sup> ) | Ref.                 |
|--------------------------------------------|--------------------------------------------------------|-------------------------------------|-------------------------------------------|----------------------|
| <b>Ni-PdCu NCs</b>                         | <b>50 mM NaBH<sub>4</sub><br/>containing 1.0 M KOH</b> | <b>50</b>                           | <b>127.8</b>                              | <b>This<br/>work</b> |
| Bimetallic PdNi/C                          | 50 mM NaBH <sub>4</sub><br>containing 1.0 M KOH        | 20                                  | 55                                        | 1                    |
| PdAuNi/C <sub>SBIPA</sub>                  | 30 mM NaBH <sub>4</sub><br>containing 2.0 M NaOH       | 50                                  | 46                                        | 2                    |
| AuNi NDs                                   | 30 mM NaBH <sub>4</sub><br>containing 2.0 M NaOH       | 50                                  | 91                                        | 3                    |
| Pd <sub>50</sub> Sn <sub>50</sub> /C       | 100 mM NaBH <sub>4</sub><br>containing 3.0 M NaOH      | 50                                  | 40.9                                      | 4                    |
| Pd <sub>2</sub> Zn/NPC                     | 100 mM NaBH <sub>4</sub><br>containing 3.0 M NaOH      | 20                                  | 38.4                                      | 5                    |
| C <sub>Ni</sub> -S <sub>Pd</sub> /rGO      | 100 mM NaBH <sub>4</sub><br>containing 1.0 M NaOH      | 100                                 | 39.1                                      | 6                    |
| Pd <sub>10</sub> -Co <sub>90</sub> /rGO    | 100 mM NaBH <sub>4</sub><br>containing 1.0 M KOH       | 50                                  | 42                                        | 7                    |
| YH <sub>2</sub> -Pd                        | 50 mM NaBH <sub>4</sub><br>containing 2.0 M NaOH       | 50                                  | 75                                        | 8                    |
| Au <sub>52</sub> Cu <sub>48</sub> aerogels | 100 mM NaBH <sub>4</sub><br>containing 3.0 M NaOH      | 20                                  | 53                                        | 9                    |
| PdAu/rGO                                   | 30 mM NaBH <sub>4</sub><br>containing 2.0 M NaOH       | 10                                  | 49.6                                      | 10                   |
| PdAg/rGO                                   | 30 mM NaBH <sub>4</sub><br>containing 2.0 M NaOH       | 10                                  | 6.2                                       | 10                   |

## References

- 1 S. Saha, P. Gayen, Z. Wang, R. J. Dixit, K. Sharma, S. Basu and V. K. Ramani, *ACS Catal.*, 2021, **11**, 8417-8430.
- 2 A. M. A. ElSheikh, G. Backovic, R. C. P. Oliveira, C. A. C. Sequeira, J. McGregor, B. Sljukic and D. M. F. Santos, *Nanomaterials*, 2021, **11**, 1441.
- 3 J. Wang, F. Chen, Y. Jin, Y. Lei and R. L. Johnston, *Adv. Funct. Mater.*, 2017, **27**, 1700260.
- 4 L. Yi, Y. Meng, R. Wang, J. Fei, X. Wang and Y. Lu, *New J. Chem.*, 2020, **44**, 13472-13479.
- 5 J. Liu, L. Yi, X. Wang, Q. Zhao, Y. Zhang, J. Gao and W. Wei, *Int. J. Hydrogen Energy*, 2015, **40**, 7301-7307.
- 6 R. Mahmoodi, M. Chalani, M. G. Hosseini and M. Darbandi, *New J. Chem.*, 2020, **44**, 11974-11987.
- 7 R. Ghasemi, B. K. Moghadas and I. Mohammadi, *Int. J. Hydrogen Energy*, 2020, **45**, 21808-21815.
- 8 J. Chen, J. Fu, K. Fu, R. Xiao, Y. Wu, X. Zheng, Z. Liu, J. Zheng and X. Li, *J. Mater. Chem. A*, 2017, **5**, 14310-14318.
- 9 J. Wang, F. Chen, Y. Jin and R. L. Johnston, *ChemSusChem*, 2018, **11**, 1354-1364.
- 10 M. Martins, B. Šljukić, Ö. Metin, M. Sevim, C. A. C. Sequeira, T. Şener and D. M. F. Santos, *J. Alloys Compd.*, 2017, **718**, 204-214.
